# Supplementary material for: A Randomized, Placebo‐Controlled Study of Methotrexate to Increase Response Rates in Patients with Uncontrolled Gout Receiving Pegloticase: Primary Efficacy and Safety Findings
Source: PubMed Central journal article supplement — Arthritis Rheumatol. 2022 Dec 16;75(2):293–304. doi: 10.1002/art.42335 (PMC10107774; doi:10.1002/art.42335), 2022-12-16
Supplement: ART-75-293-s001.pdf [file ART-75-293-s001.pdf]

ICMJE DISCLOSURE FORM

Date: 28 July 2022

Your Name: John K. Botson, MD

Manuscript Title: A Randomized Placebo-Controlled Study of Methotrexate to Increase Response Rates in Patients with Uncontrolled GOut Receiving Pegloticase (MIRROR RCT): Primary Efficacy and Safety Findings

Manuscript number (if known): ar-22-0825

In the interest of transparency, we ask you to disclose all relationships/activities/interests listed below that are related to the content of your manuscript. "Related" means any relation with for-profit or not-for-profit third parties whose interests may be affected by the content of the manuscript. Disclosure represents a commitment to transparency and does not necessarily indicate a bias. If you are in doubt about whether to list a relationship/activity/interest, it is preferable that you do so.

The following questions apply to the author's relationships/activities/interests as they relate to the current manuscript only.

The author's relationships/activities/interests should be defined broadly. For example, if your manuscript pertains to the epidemiology of hypertension, you should declare all relationships with manufacturers of antihypertensive medication, even if that medication is not mentioned in the manuscript.

In item #1 below, report all support for the work reported in this manuscript without time limit. For all other items, the time frame for disclosure is the past 36 months.

|                                                           |                                                                                                                                                                                | Name all entities with whom you have this relationship or indicate none (add rows as needed) | Specifications/Comments (e.g., if payments were made to you or to your institution)                                                                                                              |
|-----------------------------------------------------------|--------------------------------------------------------------------------------------------------------------------------------------------------------------------------------|----------------------------------------------------------------------------------------------|--------------------------------------------------------------------------------------------------------------------------------------------------------------------------------------------------|
| <b>Time frame: Since the initial planning of the work</b> |                                                                                                                                                                                |                                                                                              |                                                                                                                                                                                                  |
| 1                                                         | All support for the present manuscript (e.g., funding, provision of study materials, medical writing, article processing charges, etc.)<br><b>No time limit for this item.</b> | Horizon Therapeutics plc                                                                     | Research support for the study (study site/primary investigator) received. Medical writing support and processing charges provided by Horizon, but no related payments were made to this author. |
|                                                           |                                                                                                                                                                                |                                                                                              |                                                                                                                                                                                                  |
|                                                           |                                                                                                                                                                                |                                                                                              |                                                                                                                                                                                                  |
|                                                           |                                                                                                                                                                                |                                                                                              |                                                                                                                                                                                                  |
|                                                           |                                                                                                                                                                                |                                                                                              |                                                                                                                                                                                                  |
|                                                           |                                                                                                                                                                                |                                                                                              |                                                                                                                                                                                                  |
| <b>Time frame: past 36 months</b>                         |                                                                                                                                                                                |                                                                                              |                                                                                                                                                                                                  |
| 2                                                         | Grants or contracts from any entity (if not indicated in item #1 above).                                                                                                       | <u> X </u> None                                                                              |                                                                                                                                                                                                  |
|                                                           |                                                                                                                                                                                |                                                                                              |                                                                                                                                                                                                  |
| 3                                                         | Royalties or licenses                                                                                                                                                          | <u> X </u> None                                                                              |                                                                                                                                                                                                  |
|                                                           |                                                                                                                                                                                |                                                                                              |                                                                                                                                                                                                  |

|    |                                                                                                              |                            |                                                                                                     |
|----|--------------------------------------------------------------------------------------------------------------|----------------------------|-----------------------------------------------------------------------------------------------------|
|    |                                                                                                              |                            |                                                                                                     |
| 4  | Consulting fees                                                                                              | Horizon Therapeutics plc   | Consulting fees                                                                                     |
| 5  | Payment or honoraria for lectures, presentations, speakers bureaus, manuscript writing or educational events | Horizon Therapeutics plc   | Speaker fees                                                                                        |
| 6  | Payment for expert testimony                                                                                 | <u>  </u> X <u>  </u> None |                                                                                                     |
| 7  | Support for attending meetings and/or travel                                                                 | Horizon Therapeutics plc   | Travel expenses                                                                                     |
| 8  | Patents planned, issued or pending                                                                           | Horizon Therapeutics plc   | Named on patent                                                                                     |
| 9  | Participation on a Data Safety Monitoring Board or Advisory Board                                            | <u>  </u> X <u>  </u> None |                                                                                                     |
| 10 | Leadership or fiduciary role in other board, society, committee or advocacy group, paid or unpaid            | <u>  </u> X <u>  </u> None |                                                                                                     |
| 11 | Stock or stock options                                                                                       | <u>  </u> X <u>  </u> None |                                                                                                     |
| 12 | Receipt of equipment, materials, drugs, medical writing, gifts or other services                             | Horizon Therapeutics plc   | Medical writing support for Horizon-funded projects was provided (no funds received by the author). |
| 13 | Other financial or non-financial interests                                                                   | <u>  </u> X <u>  </u> None |                                                                                                     |

Please place an "X" next to the following statement to indicate your agreement:

   X    I certify that I have answered every question and have not altered the wording of any of the questions on this form.

ICMJE DISCLOSURE FORM

Date: 26 July 2022

Your Name: Jason Chamberlain PhD

Manuscript Title: A Randomized Placebo-Controlled Study of Methotrexate to Increase Response Rates in Patients with Uncontrolled GOut Receiving Pegloticase (MIRROR RCT): Primary Efficacy and Safety Findings

Manuscript number (if known): ar-22-0825

In the interest of transparency, we ask you to disclose all relationships/activities/interests listed below that are related to the content of your manuscript. "Related" means any relation with for-profit or not-for-profit third parties whose interests may be affected by the content of the manuscript. Disclosure represents a commitment to transparency and does not necessarily indicate a bias. If you are in doubt about whether to list a relationship/activity/interest, it is preferable that you do so.

The following questions apply to the author's relationships/activities/interests as they relate to the current manuscript only.

The author's relationships/activities/interests should be defined broadly. For example, if your manuscript pertains to the epidemiology of hypertension, you should declare all relationships with manufacturers of antihypertensive medication, even if that medication is not mentioned in the manuscript.

In item #1 below, report all support for the work reported in this manuscript without time limit. For all other items, the time frame for disclosure is the past 36 months.

|                                                           |                                                                                                                                                                                | Name all entities with whom you have this relationship or indicate none (add rows as needed) | Specifications/Comments (e.g., if payments were made to you or to your institution) |
|-----------------------------------------------------------|--------------------------------------------------------------------------------------------------------------------------------------------------------------------------------|----------------------------------------------------------------------------------------------|-------------------------------------------------------------------------------------|
| <b>Time frame: Since the initial planning of the work</b> |                                                                                                                                                                                |                                                                                              |                                                                                     |
| 1                                                         | All support for the present manuscript (e.g., funding, provision of study materials, medical writing, article processing charges, etc.)<br><b>No time limit for this item.</b> | Horizon Therapeutics plc                                                                     | Employee of and stock holder in Horizon.                                            |
|                                                           |                                                                                                                                                                                |                                                                                              |                                                                                     |
|                                                           |                                                                                                                                                                                |                                                                                              |                                                                                     |
|                                                           |                                                                                                                                                                                |                                                                                              |                                                                                     |
|                                                           |                                                                                                                                                                                |                                                                                              |                                                                                     |
|                                                           |                                                                                                                                                                                |                                                                                              |                                                                                     |
| <b>Time frame: past 36 months</b>                         |                                                                                                                                                                                |                                                                                              |                                                                                     |
| 2                                                         | Grants or contracts from any entity (if not indicated in item #1 above).                                                                                                       | <u> X </u> None                                                                              |                                                                                     |
|                                                           |                                                                                                                                                                                |                                                                                              |                                                                                     |
| 3                                                         | Royalties or licenses                                                                                                                                                          | <u> X </u> None                                                                              |                                                                                     |
|                                                           |                                                                                                                                                                                |                                                                                              |                                                                                     |
| 4                                                         | Consulting fees                                                                                                                                                                | <u> X </u> None                                                                              |                                                                                     |

|    |                                                                                                              |                            |              |
|----|--------------------------------------------------------------------------------------------------------------|----------------------------|--------------|
| 5  | Payment or honoraria for lectures, presentations, speakers bureaus, manuscript writing or educational events | <u>  </u> X <u>  </u> None |              |
| 6  | Payment for expert testimony                                                                                 | <u>  </u> X <u>  </u> None |              |
| 7  | Support for attending meetings and/or travel                                                                 | <u>  </u> X <u>  </u> None |              |
| 8  | Patents planned, issued or pending                                                                           | <u>  </u> X <u>  </u> None |              |
| 9  | Participation on a Data Safety Monitoring Board or Advisory Board                                            | <u>  </u> X <u>  </u> None |              |
| 10 | Leadership or fiduciary role in other board, society, committee or advocacy group, paid or unpaid            | <u>  </u> X <u>  </u> None |              |
| 11 | Stock or stock options                                                                                       | Horizon Therapeutics plc   | Stock holder |
| 12 | Receipt of equipment, materials, drugs, medical writing, gifts or other services                             | <u>  </u> X <u>  </u> None |              |
| 13 | Other financial or non-financial interests                                                                   | <u>  </u> X <u>  </u> None |              |

Please place an "X" next to the following statement to indicate your agreement:

   X    I certify that I have answered every question and have not altered the wording of any of the questions on this form.

**ICMJE DISCLOSURE FORM**

**Date:** 26 July 2022

**Your Name:** Suneet Grewal, MD

**Manuscript Title:** A Randomized Placebo-Controlled Study of Methotrexate to Increase Response Rates in Patients with Uncontrolled GOut Receiving Pegloticase (MIRROR RCT): Primary Efficacy and Safety Findings

**Manuscript number (if known):** ar-22-0825

In the interest of transparency, we ask you to disclose all relationships/activities/interests listed below that are related to the content of your manuscript. "Related" means any relation with for-profit or not-for-profit third parties whose interests may be affected by the content of the manuscript. Disclosure represents a commitment to transparency and does not necessarily indicate a bias. If you are in doubt about whether to list a relationship/activity/interest, it is preferable that you do so.

The following questions apply to the author's relationships/activities/interests as they relate to the current manuscript only.

The author's relationships/activities/interests should be defined broadly. For example, if your manuscript pertains to the epidemiology of hypertension, you should declare all relationships with manufacturers of antihypertensive medication, even if that medication is not mentioned in the manuscript.

In item #1 below, report all support for the work reported in this manuscript without time limit. For all other items, the time frame for disclosure is the past 36 months.

|                                                           |                                                                                                                                                                                | Name all entities with whom you have this relationship or indicate none (add rows as needed) | Specifications/Comments (e.g., if payments were made to you or to your institution)                                                                                                      |
|-----------------------------------------------------------|--------------------------------------------------------------------------------------------------------------------------------------------------------------------------------|----------------------------------------------------------------------------------------------|------------------------------------------------------------------------------------------------------------------------------------------------------------------------------------------|
| <b>Time frame: Since the initial planning of the work</b> |                                                                                                                                                                                |                                                                                              |                                                                                                                                                                                          |
| 1                                                         | All support for the present manuscript (e.g., funding, provision of study materials, medical writing, article processing charges, etc.)<br><b>No time limit for this item.</b> | Horizon Therapeutics plc                                                                     | Research support for the study (study site/investigator) received. Medical writing support and processing charges provided by Horizon, but no related payments were made to this author. |
|                                                           |                                                                                                                                                                                |                                                                                              |                                                                                                                                                                                          |
|                                                           |                                                                                                                                                                                |                                                                                              |                                                                                                                                                                                          |
|                                                           |                                                                                                                                                                                |                                                                                              |                                                                                                                                                                                          |
|                                                           |                                                                                                                                                                                |                                                                                              |                                                                                                                                                                                          |
|                                                           |                                                                                                                                                                                |                                                                                              |                                                                                                                                                                                          |
| <b>Time frame: past 36 months</b>                         |                                                                                                                                                                                |                                                                                              |                                                                                                                                                                                          |
| 2                                                         | Grants or contracts from any entity (if not indicated in item #1 above).                                                                                                       | <u> X </u> None                                                                              |                                                                                                                                                                                          |
|                                                           |                                                                                                                                                                                |                                                                                              |                                                                                                                                                                                          |
|                                                           |                                                                                                                                                                                |                                                                                              |                                                                                                                                                                                          |
| 3                                                         | Royalties or licenses                                                                                                                                                          | <u> X </u> None                                                                              |                                                                                                                                                                                          |
|                                                           |                                                                                                                                                                                |                                                                                              |                                                                                                                                                                                          |
|                                                           |                                                                                                                                                                                |                                                                                              |                                                                                                                                                                                          |

|    |                                                                                                              |                          |             |
|----|--------------------------------------------------------------------------------------------------------------|--------------------------|-------------|
| 4  | Consulting fees                                                                                              | Horizon Therapeutics plc | Speaker fee |
| 5  | Payment or honoraria for lectures, presentations, speakers bureaus, manuscript writing or educational events | <u>  X  </u> None        |             |
| 6  | Payment for expert testimony                                                                                 | <u>  X  </u> None        |             |
| 7  | Support for attending meetings and/or travel                                                                 | <u>  X  </u> None        |             |
| 8  | Patents planned, issued or pending                                                                           | <u>  X  </u> None        |             |
| 9  | Participation on a Data Safety Monitoring Board or Advisory Board                                            | <u>  X  </u> None        |             |
| 10 | Leadership or fiduciary role in other board, society, committee or advocacy group, paid or unpaid            | <u>  X  </u> None        |             |
| 11 | Stock or stock options                                                                                       | <u>  X  </u> None        |             |
| 12 | Receipt of equipment, materials, drugs, medical writing, gifts or other services                             |                          |             |
| 13 | Other financial or non-financial interests                                                                   | <u>  X  </u> None        |             |

Please place an "X" next to the following statement to indicate your agreement:

  X   I certify that I have answered every question and have not altered the wording of any of the questions on this form.

**ICMJE DISCLOSURE FORM**

**Date:** 26 July 2022

**Your Name:** Dan La, MD

**Manuscript Title:** A Randomized Placebo-Controlled Study of Methotrexate to Increase Response Rates in Patients with Uncontrolled GOut Receiving Pegloticase (MIRROR RCT): Primary Efficacy and Safety Findings

**Manuscript number (if known):** ar-22-0825

In the interest of transparency, we ask you to disclose all relationships/activities/interests listed below that are related to the content of your manuscript. "Related" means any relation with for-profit or not-for-profit third parties whose interests may be affected by the content of the manuscript. Disclosure represents a commitment to transparency and does not necessarily indicate a bias. If you are in doubt about whether to list a relationship/activity/interest, it is preferable that you do so.

The following questions apply to the author's relationships/activities/interests as they relate to the current manuscript only.

The author's relationships/activities/interests should be defined broadly. For example, if your manuscript pertains to the epidemiology of hypertension, you should declare all relationships with manufacturers of antihypertensive medication, even if that medication is not mentioned in the manuscript.

In item #1 below, report all support for the work reported in this manuscript without time limit. For all other items, the time frame for disclosure is the past 36 months.

|                                                           |                                                                                                                                                                                | Name all entities with whom you have this relationship or indicate none (add rows as needed) | Specifications/Comments (e.g., if payments were made to you or to your institution)                                                                                                        |
|-----------------------------------------------------------|--------------------------------------------------------------------------------------------------------------------------------------------------------------------------------|----------------------------------------------------------------------------------------------|--------------------------------------------------------------------------------------------------------------------------------------------------------------------------------------------|
| <b>Time frame: Since the initial planning of the work</b> |                                                                                                                                                                                |                                                                                              |                                                                                                                                                                                            |
| 1                                                         | All support for the present manuscript (e.g., funding, provision of study materials, medical writing, article processing charges, etc.)<br><b>No time limit for this item.</b> | Horizon Therapeutics plc                                                                     | Research support for this study (study site/ investigator) received. Medical writing support and processing charges provided by Horizon, but no related payments were made to this author. |
|                                                           |                                                                                                                                                                                |                                                                                              |                                                                                                                                                                                            |
|                                                           |                                                                                                                                                                                |                                                                                              |                                                                                                                                                                                            |
|                                                           |                                                                                                                                                                                |                                                                                              |                                                                                                                                                                                            |
|                                                           |                                                                                                                                                                                |                                                                                              |                                                                                                                                                                                            |
|                                                           |                                                                                                                                                                                |                                                                                              |                                                                                                                                                                                            |
| <b>Time frame: past 36 months</b>                         |                                                                                                                                                                                |                                                                                              |                                                                                                                                                                                            |
| 2                                                         | Grants or contracts from any entity (if not indicated in item #1 above).                                                                                                       | <u> X </u> None                                                                              |                                                                                                                                                                                            |
|                                                           |                                                                                                                                                                                |                                                                                              |                                                                                                                                                                                            |
|                                                           |                                                                                                                                                                                |                                                                                              |                                                                                                                                                                                            |
| 3                                                         | Royalties or licenses                                                                                                                                                          | <u> X </u> None                                                                              |                                                                                                                                                                                            |
|                                                           |                                                                                                                                                                                |                                                                                              |                                                                                                                                                                                            |
|                                                           |                                                                                                                                                                                |                                                                                              |                                                                                                                                                                                            |

|    |                                                                                                              |                            |  |
|----|--------------------------------------------------------------------------------------------------------------|----------------------------|--|
| 4  | Consulting fees                                                                                              | <u>  </u> X <u>  </u> None |  |
| 5  | Payment or honoraria for lectures, presentations, speakers bureaus, manuscript writing or educational events | <u>  </u> X <u>  </u> None |  |
| 6  | Payment for expert testimony                                                                                 | <u>  </u> X <u>  </u> None |  |
| 7  | Support for attending meetings and/or travel                                                                 | <u>  </u> X <u>  </u> None |  |
| 8  | Patents planned, issued or pending                                                                           | <u>  </u> X <u>  </u> None |  |
| 9  | Participation on a Data Safety Monitoring Board or Advisory Board                                            | <u>  </u> X <u>  </u> None |  |
| 10 | Leadership or fiduciary role in other board, society, committee or advocacy group, paid or unpaid            | <u>  </u> X <u>  </u> None |  |
| 11 | Stock or stock options                                                                                       | <u>  </u> X <u>  </u> None |  |
| 12 | Receipt of equipment, materials, drugs, medical writing, gifts or other services                             |                            |  |
| 13 | Other financial or non-financial interests                                                                   | <u>  </u> X <u>  </u> None |  |

Please place an "X" next to the following statement to indicate your agreement:

   X    I certify that I have answered every question and have not altered the wording of any of the questions on this form.



**ICMJE DISCLOSURE FORM**

**Date:** 28 July 2022

**Your Name:** Brian LaMoreaux MD

**Manuscript Title:** A Randomized Placebo-Controlled Study of Methotrexate to Increase Response Rates in Patients with Uncontrolled GOut Receiving Pegloticase (MIRROR RCT): Primary Efficacy and Safety Findings

**Manuscript number (if known):** ar-22-0825

In the interest of transparency, we ask you to disclose all relationships/activities/interests listed below that are related to the content of your manuscript. "Related" means any relation with for-profit or not-for-profit third parties whose interests may be affected by the content of the manuscript. Disclosure represents a commitment to transparency and does not necessarily indicate a bias. If you are in doubt about whether to list a relationship/activity/interest, it is preferable that you do so.

The following questions apply to the author's relationships/activities/interests as they relate to the current manuscript only.

The author's relationships/activities/interests should be defined broadly. For example, if your manuscript pertains to the epidemiology of hypertension, you should declare all relationships with manufacturers of antihypertensive medication, even if that medication is not mentioned in the manuscript.

In item #1 below, report all support for the work reported in this manuscript without time limit. For all other items, the time frame for disclosure is the past 36 months.

|                                                           |                                                                                                                                                                                | Name all entities with whom you have this relationship or indicate none (add rows as needed) | Specifications/Comments (e.g., if payments were made to you or to your institution) |
|-----------------------------------------------------------|--------------------------------------------------------------------------------------------------------------------------------------------------------------------------------|----------------------------------------------------------------------------------------------|-------------------------------------------------------------------------------------|
| <b>Time frame: Since the initial planning of the work</b> |                                                                                                                                                                                |                                                                                              |                                                                                     |
| 1                                                         | All support for the present manuscript (e.g., funding, provision of study materials, medical writing, article processing charges, etc.)<br><b>No time limit for this item.</b> | Horizon Therapeutics plc                                                                     | Employee of and stock holder in Horizon.                                            |
|                                                           |                                                                                                                                                                                |                                                                                              |                                                                                     |
|                                                           |                                                                                                                                                                                |                                                                                              |                                                                                     |
|                                                           |                                                                                                                                                                                |                                                                                              |                                                                                     |
|                                                           |                                                                                                                                                                                |                                                                                              |                                                                                     |
| <b>Time frame: past 36 months</b>                         |                                                                                                                                                                                |                                                                                              |                                                                                     |
| 2                                                         | Grants or contracts from any entity (if not indicated in item #1 above).                                                                                                       | <u> X </u> None                                                                              |                                                                                     |
|                                                           |                                                                                                                                                                                |                                                                                              |                                                                                     |
| 3                                                         | Royalties or licenses                                                                                                                                                          | <u> X </u> None                                                                              |                                                                                     |
|                                                           |                                                                                                                                                                                |                                                                                              |                                                                                     |
| 4                                                         | Consulting fees                                                                                                                                                                | <u> X </u> None                                                                              |                                                                                     |
|                                                           |                                                                                                                                                                                |                                                                                              |                                                                                     |
| 5                                                         | Payment or honoraria for lectures, presentations,                                                                                                                              | <u> X </u> None                                                                              |                                                                                     |
|                                                           |                                                                                                                                                                                |                                                                                              |                                                                                     |

|    |                                                                                                   |                          |                  |
|----|---------------------------------------------------------------------------------------------------|--------------------------|------------------|
|    | speakers bureaus, manuscript writing or educational events                                        |                          |                  |
| 6  | Payment for expert testimony                                                                      | <u> X </u> None          |                  |
| 7  | Support for attending meetings and/or travel                                                      | <u> X </u> None          |                  |
| 8  | Patents planned, issued or pending                                                                | Horizon Therapeutics plc | Named on patent. |
| 9  | Participation on a Data Safety Monitoring Board or Advisory Board                                 | <u> X </u> None          |                  |
| 10 | Leadership or fiduciary role in other board, society, committee or advocacy group, paid or unpaid | <u> X </u> None          |                  |
| 11 | Stock or stock options                                                                            | Horizon Therapeutics plc | Stock holder     |
| 12 | Receipt of equipment, materials, drugs, medical writing, gifts or other services                  | <u> X </u> None          |                  |
| 13 | Other financial or non-financial interests                                                        | <u> X </u> None          |                  |

Please place an "X" next to the following statement to indicate your agreement:

X  I certify that I have answered every question and have not altered the wording of any of the questions on this form.

**ICMJE DISCLOSURE FORM**

**Date:** 26 July 2022

**Your Name:** Karon LoCicero MD

**Manuscript Title:** A Randomized Placebo-Controlled Study of Methotrexate to Increase Response Rates in Patients with Uncontrolled GOut Receiving Pegloticase (MIRROR RCT): Primary Efficacy and Safety Findings

**Manuscript number (if known):** ar-22-0825

In the interest of transparency, we ask you to disclose all relationships/activities/interests listed below that are related to the content of your manuscript. "Related" means any relation with for-profit or not-for-profit third parties whose interests may be affected by the content of the manuscript. Disclosure represents a commitment to transparency and does not necessarily indicate a bias. If you are in doubt about whether to list a relationship/activity/interest, it is preferable that you do so.

The following questions apply to the author's relationships/activities/interests as they relate to the current manuscript only.

The author's relationships/activities/interests should be defined broadly. For example, if your manuscript pertains to the epidemiology of hypertension, you should declare all relationships with manufacturers of antihypertensive medication, even if that medication is not mentioned in the manuscript.

In item #1 below, report all support for the work reported in this manuscript without time limit. For all other items, the time frame for disclosure is the past 36 months.

|                                                           |                                                                                                                                                                                | Name all entities with whom you have this relationship or indicate none (add rows as needed) | Specifications/Comments (e.g., if payments were made to you or to your institution)                                                                                                      |
|-----------------------------------------------------------|--------------------------------------------------------------------------------------------------------------------------------------------------------------------------------|----------------------------------------------------------------------------------------------|------------------------------------------------------------------------------------------------------------------------------------------------------------------------------------------|
| <b>Time frame: Since the initial planning of the work</b> |                                                                                                                                                                                |                                                                                              |                                                                                                                                                                                          |
| 1                                                         | All support for the present manuscript (e.g., funding, provision of study materials, medical writing, article processing charges, etc.)<br><b>No time limit for this item.</b> | Horizon Therapeutics plc                                                                     | Research support for the study (study site/investigator) received. Medical writing support and processing charges provided by Horizon, but no related payments were made to this author. |
|                                                           |                                                                                                                                                                                |                                                                                              |                                                                                                                                                                                          |
|                                                           |                                                                                                                                                                                |                                                                                              |                                                                                                                                                                                          |
|                                                           |                                                                                                                                                                                |                                                                                              |                                                                                                                                                                                          |
|                                                           |                                                                                                                                                                                |                                                                                              |                                                                                                                                                                                          |
|                                                           |                                                                                                                                                                                |                                                                                              |                                                                                                                                                                                          |
| <b>Time frame: past 36 months</b>                         |                                                                                                                                                                                |                                                                                              |                                                                                                                                                                                          |
| 2                                                         | Grants or contracts from any entity (if not indicated in item #1 above).                                                                                                       | <u> X </u> None                                                                              |                                                                                                                                                                                          |
|                                                           |                                                                                                                                                                                |                                                                                              |                                                                                                                                                                                          |
| 3                                                         | Royalties or licenses                                                                                                                                                          | <u> X </u> None                                                                              |                                                                                                                                                                                          |
|                                                           |                                                                                                                                                                                |                                                                                              |                                                                                                                                                                                          |
|                                                           |                                                                                                                                                                                |                                                                                              |                                                                                                                                                                                          |

|    |                                                                                                              |                            |  |
|----|--------------------------------------------------------------------------------------------------------------|----------------------------|--|
| 4  | Consulting fees                                                                                              | <u>  </u> X <u>  </u> None |  |
| 5  | Payment or honoraria for lectures, presentations, speakers bureaus, manuscript writing or educational events | <u>  </u> X <u>  </u> None |  |
| 6  | Payment for expert testimony                                                                                 | <u>  </u> X <u>  </u> None |  |
| 7  | Support for attending meetings and/or travel                                                                 | <u>  </u> X <u>  </u> None |  |
| 8  | Patents planned, issued or pending                                                                           | <u>  </u> X <u>  </u> None |  |
| 9  | Participation on a Data Safety Monitoring Board or Advisory Board                                            | <u>  </u> X <u>  </u> None |  |
| 10 | Leadership or fiduciary role in other board, society, committee or advocacy group, paid or unpaid            | <u>  </u> X <u>  </u> None |  |
| 11 | Stock or stock options                                                                                       | <u>  </u> X <u>  </u> None |  |
| 12 | Receipt of equipment, materials, drugs, medical writing, gifts or other services                             |                            |  |
| 13 | Other financial or non-financial interests                                                                   | <u>  </u> X <u>  </u> None |  |

Please place an "X" next to the following statement to indicate your agreement:

   X    I certify that I have answered every question and have not altered the wording of any of the questions on this form.

**ICMJE DISCLOSURE FORM**

**Date:** 26 July 2022

**Your Name:** Amar Majjhoo, MD

**Manuscript Title:** A Randomized Placebo-Controlled Study of Methotrexate to Increase Response Rates in Patients with Uncontrolled GOut Receiving Pegloticase (MIRROR RCT): Primary Efficacy and Safety Findings

**Manuscript number (if known):** ar-22-0825

In the interest of transparency, we ask you to disclose all relationships/activities/interests listed below that are related to the content of your manuscript. "Related" means any relation with for-profit or not-for-profit third parties whose interests may be affected by the content of the manuscript. Disclosure represents a commitment to transparency and does not necessarily indicate a bias. If you are in doubt about whether to list a relationship/activity/interest, it is preferable that you do so.

The following questions apply to the author's relationships/activities/interests as they relate to the current manuscript only.

The author's relationships/activities/interests should be defined broadly. For example, if your manuscript pertains to the epidemiology of hypertension, you should declare all relationships with manufacturers of antihypertensive medication, even if that medication is not mentioned in the manuscript.

In item #1 below, report all support for the work reported in this manuscript without time limit. For all other items, the time frame for disclosure is the past 36 months.

|                                                           |                                                                                                                                                                                | Name all entities with whom you have this relationship or indicate none (add rows as needed) | Specifications/Comments (e.g., if payments were made to you or to your institution)                                                                                        |
|-----------------------------------------------------------|--------------------------------------------------------------------------------------------------------------------------------------------------------------------------------|----------------------------------------------------------------------------------------------|----------------------------------------------------------------------------------------------------------------------------------------------------------------------------|
| <b>Time frame: Since the initial planning of the work</b> |                                                                                                                                                                                |                                                                                              |                                                                                                                                                                            |
| 1                                                         | All support for the present manuscript (e.g., funding, provision of study materials, medical writing, article processing charges, etc.)<br><b>No time limit for this item.</b> | Horizon Therapeutics plc                                                                     | Research support (study site/investigator) received. Medical writing support and processing charges provided by Horizon, but no related payments were made to this author. |
|                                                           |                                                                                                                                                                                |                                                                                              |                                                                                                                                                                            |
|                                                           |                                                                                                                                                                                |                                                                                              |                                                                                                                                                                            |
|                                                           |                                                                                                                                                                                |                                                                                              |                                                                                                                                                                            |
|                                                           |                                                                                                                                                                                |                                                                                              |                                                                                                                                                                            |
|                                                           |                                                                                                                                                                                |                                                                                              |                                                                                                                                                                            |
| <b>Time frame: past 36 months</b>                         |                                                                                                                                                                                |                                                                                              |                                                                                                                                                                            |
| 2                                                         | Grants or contracts from any entity (if not indicated in item #1 above).                                                                                                       | <u> X </u> None                                                                              |                                                                                                                                                                            |
|                                                           |                                                                                                                                                                                |                                                                                              |                                                                                                                                                                            |
| 3                                                         | Royalties or licenses                                                                                                                                                          | <u> X </u> None                                                                              |                                                                                                                                                                            |
|                                                           |                                                                                                                                                                                |                                                                                              |                                                                                                                                                                            |
|                                                           |                                                                                                                                                                                |                                                                                              |                                                                                                                                                                            |

|    |                                                                                                              |                          |                 |
|----|--------------------------------------------------------------------------------------------------------------|--------------------------|-----------------|
| 4  | Consulting fees                                                                                              | Horizon Therapeutics plc | Consulting fees |
| 5  | Payment or honoraria for lectures, presentations, speakers bureaus, manuscript writing or educational events | Horizon Therapeutics plc | Speaker fees    |
| 6  | Payment for expert testimony                                                                                 | <u>  X  </u> None        |                 |
| 7  | Support for attending meetings and/or travel                                                                 | <u>  X  </u> None        |                 |
| 8  | Patents planned, issued or pending                                                                           | <u>  X  </u> None        |                 |
| 9  | Participation on a Data Safety Monitoring Board or Advisory Board                                            | <u>  X  </u> None        |                 |
| 10 | Leadership or fiduciary role in other board, society, committee or advocacy group, paid or unpaid            | <u>  X  </u> None        |                 |
| 11 | Stock or stock options                                                                                       | <u>  X  </u> None        |                 |
| 12 | Receipt of equipment, materials, drugs, medical writing, gifts or other services                             |                          |                 |
| 13 | Other financial or non-financial interests                                                                   | <u>  X  </u> None        |                 |

Please place an "X" next to the following statement to indicate your agreement:

  X   I certify that I have answered every question and have not altered the wording of any of the questions on this form.

ICMJE DISCLOSURE FORM

Date: 26 July 2022

Your Name: Katie Obermeyer MS

Manuscript Title: A Randomized Placebo-Controlled Study of Methotrexate to Increase Response Rates in Patients with Uncontrolled GOut Receiving Pegloticase (MIRROR RCT): Primary Efficacy and Safety Findings

Manuscript number (if known): ar-22-0825

In the interest of transparency, we ask you to disclose all relationships/activities/interests listed below that are related to the content of your manuscript. "Related" means any relation with for-profit or not-for-profit third parties whose interests may be affected by the content of the manuscript. Disclosure represents a commitment to transparency and does not necessarily indicate a bias. If you are in doubt about whether to list a relationship/activity/interest, it is preferable that you do so.

The following questions apply to the author's relationships/activities/interests as they relate to the current manuscript only.

The author's relationships/activities/interests should be defined broadly. For example, if your manuscript pertains to the epidemiology of hypertension, you should declare all relationships with manufacturers of antihypertensive medication, even if that medication is not mentioned in the manuscript.

In item #1 below, report all support for the work reported in this manuscript without time limit. For all other items, the time frame for disclosure is the past 36 months.

|                                                           |                                                                                                                                                                                | Name all entities with whom you have this relationship or indicate none (add rows as needed) | Specifications/Comments (e.g., if payments were made to you or to your institution) |
|-----------------------------------------------------------|--------------------------------------------------------------------------------------------------------------------------------------------------------------------------------|----------------------------------------------------------------------------------------------|-------------------------------------------------------------------------------------|
| <b>Time frame: Since the initial planning of the work</b> |                                                                                                                                                                                |                                                                                              |                                                                                     |
| 1                                                         | All support for the present manuscript (e.g., funding, provision of study materials, medical writing, article processing charges, etc.)<br><b>No time limit for this item.</b> | Horizon Therapeutics plc                                                                     | Employee of and stock holder in Horizon.                                            |
|                                                           |                                                                                                                                                                                |                                                                                              |                                                                                     |
|                                                           |                                                                                                                                                                                |                                                                                              |                                                                                     |
|                                                           |                                                                                                                                                                                |                                                                                              |                                                                                     |
|                                                           |                                                                                                                                                                                |                                                                                              |                                                                                     |
|                                                           |                                                                                                                                                                                |                                                                                              |                                                                                     |
| <b>Time frame: past 36 months</b>                         |                                                                                                                                                                                |                                                                                              |                                                                                     |
| 2                                                         | Grants or contracts from any entity (if not indicated in item #1 above).                                                                                                       | <u> X </u> None                                                                              |                                                                                     |
|                                                           |                                                                                                                                                                                |                                                                                              |                                                                                     |
| 3                                                         | Royalties or licenses                                                                                                                                                          | <u> X </u> None                                                                              |                                                                                     |
|                                                           |                                                                                                                                                                                |                                                                                              |                                                                                     |
| 4                                                         | Consulting fees                                                                                                                                                                | <u> X </u> None                                                                              |                                                                                     |

|    |                                                                                                              |                            |              |
|----|--------------------------------------------------------------------------------------------------------------|----------------------------|--------------|
| 5  | Payment or honoraria for lectures, presentations, speakers bureaus, manuscript writing or educational events | <u>  </u> X <u>  </u> None |              |
| 6  | Payment for expert testimony                                                                                 | <u>  </u> X <u>  </u> None |              |
| 7  | Support for attending meetings and/or travel                                                                 | <u>  </u> X <u>  </u> None |              |
| 8  | Patents planned, issued or pending                                                                           | <u>  </u> X <u>  </u> None |              |
| 9  | Participation on a Data Safety Monitoring Board or Advisory Board                                            | <u>  </u> X <u>  </u> None |              |
| 10 | Leadership or fiduciary role in other board, society, committee or advocacy group, paid or unpaid            | <u>  </u> X <u>  </u> None |              |
| 11 | Stock or stock options                                                                                       | Horizon Therapeutics plc   | Stock holder |
| 12 | Receipt of equipment, materials, drugs, medical writing, gifts or other services                             | <u>  </u> X <u>  </u> None |              |
| 13 | Other financial or non-financial interests                                                                   | <u>  </u> X <u>  </u> None |              |

Please place an "X" next to the following statement to indicate your agreement:

   X    I certify that I have answered every question and have not altered the wording of any of the questions on this form.



ICMJE DISCLOSURE FORM

Date: 26 July 2022

Your Name: Stephen Ong, MD

Manuscript Title: A Randomized Placebo-Controlled Study of Methotrexate to Increase Response Rates in Patients with Uncontrolled GOut Receiving Pegloticase (MIRROR RCT): Primary Efficacy and Safety Findings

Manuscript number (if known): ar-22-0825

In the interest of transparency, we ask you to disclose all relationships/activities/interests listed below that are related to the content of your manuscript. "Related" means any relation with for-profit or not-for-profit third parties whose interests may be affected by the content of the manuscript. Disclosure represents a commitment to transparency and does not necessarily indicate a bias. If you are in doubt about whether to list a relationship/activity/interest, it is preferable that you do so.

The following questions apply to the author's relationships/activities/interests as they relate to the current manuscript only.

The author's relationships/activities/interests should be defined broadly. For example, if your manuscript pertains to the epidemiology of hypertension, you should declare all relationships with manufacturers of antihypertensive medication, even if that medication is not mentioned in the manuscript.

In item #1 below, report all support for the work reported in this manuscript without time limit. For all other items, the time frame for disclosure is the past 36 months.

|                                                           |                                                                                                                                                                                | Name all entities with whom you have this relationship or indicate none (add rows as needed) | Specifications/Comments (e.g., if payments were made to you or to your institution)                                                                                                      |
|-----------------------------------------------------------|--------------------------------------------------------------------------------------------------------------------------------------------------------------------------------|----------------------------------------------------------------------------------------------|------------------------------------------------------------------------------------------------------------------------------------------------------------------------------------------|
| <b>Time frame: Since the initial planning of the work</b> |                                                                                                                                                                                |                                                                                              |                                                                                                                                                                                          |
| 1                                                         | All support for the present manuscript (e.g., funding, provision of study materials, medical writing, article processing charges, etc.)<br><b>No time limit for this item.</b> | Horizon Therapeutics plc                                                                     | Research support for the study (study site/investigator) received. Medical writing support and processing charges provided by Horizon, but no related payments were made to this author. |
|                                                           |                                                                                                                                                                                |                                                                                              |                                                                                                                                                                                          |
|                                                           |                                                                                                                                                                                |                                                                                              |                                                                                                                                                                                          |
|                                                           |                                                                                                                                                                                |                                                                                              |                                                                                                                                                                                          |
|                                                           |                                                                                                                                                                                |                                                                                              |                                                                                                                                                                                          |
|                                                           |                                                                                                                                                                                |                                                                                              |                                                                                                                                                                                          |
| <b>Time frame: past 36 months</b>                         |                                                                                                                                                                                |                                                                                              |                                                                                                                                                                                          |
| 2                                                         | Grants or contracts from any entity (if not indicated in item #1 above).                                                                                                       | Horizon Therapeutics plc                                                                     | Research grant                                                                                                                                                                           |
|                                                           |                                                                                                                                                                                |                                                                                              |                                                                                                                                                                                          |
| 3                                                         | Royalties or licenses                                                                                                                                                          | <u> X </u> None                                                                              |                                                                                                                                                                                          |
|                                                           |                                                                                                                                                                                |                                                                                              |                                                                                                                                                                                          |
|                                                           |                                                                                                                                                                                |                                                                                              |                                                                                                                                                                                          |

|    |                                                                                                              |                            |  |
|----|--------------------------------------------------------------------------------------------------------------|----------------------------|--|
| 4  | Consulting fees                                                                                              | <u>  </u> X <u>  </u> None |  |
| 5  | Payment or honoraria for lectures, presentations, speakers bureaus, manuscript writing or educational events | <u>  </u> X <u>  </u> None |  |
| 6  | Payment for expert testimony                                                                                 | <u>  </u> X <u>  </u> None |  |
| 7  | Support for attending meetings and/or travel                                                                 | <u>  </u> X <u>  </u> None |  |
| 8  | Patents planned, issued or pending                                                                           | <u>  </u> X <u>  </u> None |  |
| 9  | Participation on a Data Safety Monitoring Board or Advisory Board                                            | <u>  </u> X <u>  </u> None |  |
| 10 | Leadership or fiduciary role in other board, society, committee or advocacy group, paid or unpaid            | <u>  </u> X <u>  </u> None |  |
| 11 | Stock or stock options                                                                                       | <u>  </u> X <u>  </u> None |  |
| 12 | Receipt of equipment, materials, drugs, medical writing, gifts or other services                             |                            |  |
| 13 | Other financial or non-financial interests                                                                   | <u>  </u> X <u>  </u> None |  |

Please place an "X" next to the following statement to indicate your agreement:

   X    I certify that I have answered every question and have not altered the wording of any of the questions on this form.

**ICMJE DISCLOSURE FORM**

**Date:** 26 July 2022

**Your Name:** Naval Parikh, MD

**Manuscript Title:** A Randomized Placebo-Controlled Study of Methotrexate to Increase Response Rates in Patients with Uncontrolled GOut Receiving Pegloticase (MIRROR RCT): Primary Efficacy and Safety Findings

**Manuscript number (if known):** ar-22-0825

In the interest of transparency, we ask you to disclose all relationships/activities/interests listed below that are related to the content of your manuscript. "Related" means any relation with for-profit or not-for-profit third parties whose interests may be affected by the content of the manuscript. Disclosure represents a commitment to transparency and does not necessarily indicate a bias. If you are in doubt about whether to list a relationship/activity/interest, it is preferable that you do so.

The following questions apply to the author's relationships/activities/interests as they relate to the current manuscript only.

The author's relationships/activities/interests should be defined broadly. For example, if your manuscript pertains to the epidemiology of hypertension, you should declare all relationships with manufacturers of antihypertensive medication, even if that medication is not mentioned in the manuscript.

In item #1 below, report all support for the work reported in this manuscript without time limit. For all other items, the time frame for disclosure is the past 36 months.

|                                                           |                                                                                                                                                                                | Name all entities with whom you have this relationship or indicate none (add rows as needed) | Specifications/Comments (e.g., if payments were made to you or to your institution)                                                                                                              |
|-----------------------------------------------------------|--------------------------------------------------------------------------------------------------------------------------------------------------------------------------------|----------------------------------------------------------------------------------------------|--------------------------------------------------------------------------------------------------------------------------------------------------------------------------------------------------|
| <b>Time frame: Since the initial planning of the work</b> |                                                                                                                                                                                |                                                                                              |                                                                                                                                                                                                  |
| 1                                                         | All support for the present manuscript (e.g., funding, provision of study materials, medical writing, article processing charges, etc.)<br><b>No time limit for this item.</b> | Horizon Therapeutics plc                                                                     | Research support for the study (study site/primary investigator) received. Medical writing support and processing charges provided by Horizon, but no related payments were made to this author. |
|                                                           |                                                                                                                                                                                |                                                                                              |                                                                                                                                                                                                  |
|                                                           |                                                                                                                                                                                |                                                                                              |                                                                                                                                                                                                  |
|                                                           |                                                                                                                                                                                |                                                                                              |                                                                                                                                                                                                  |
|                                                           |                                                                                                                                                                                |                                                                                              |                                                                                                                                                                                                  |
|                                                           |                                                                                                                                                                                |                                                                                              |                                                                                                                                                                                                  |
| <b>Time frame: past 36 months</b>                         |                                                                                                                                                                                |                                                                                              |                                                                                                                                                                                                  |
| 2                                                         | Grants or contracts from any entity (if not indicated in item #1 above).                                                                                                       | <u> X </u> None                                                                              |                                                                                                                                                                                                  |
|                                                           |                                                                                                                                                                                |                                                                                              |                                                                                                                                                                                                  |
| 3                                                         | Royalties or licenses                                                                                                                                                          | <u> X </u> None                                                                              |                                                                                                                                                                                                  |
|                                                           |                                                                                                                                                                                |                                                                                              |                                                                                                                                                                                                  |
|                                                           |                                                                                                                                                                                |                                                                                              |                                                                                                                                                                                                  |

|    |                                                                                                              |                            |  |
|----|--------------------------------------------------------------------------------------------------------------|----------------------------|--|
| 4  | Consulting fees                                                                                              | <u>  </u> X <u>  </u> None |  |
| 5  | Payment or honoraria for lectures, presentations, speakers bureaus, manuscript writing or educational events | <u>  </u> X <u>  </u> None |  |
| 6  | Payment for expert testimony                                                                                 | <u>  </u> X <u>  </u> None |  |
| 7  | Support for attending meetings and/or travel                                                                 | <u>  </u> X <u>  </u> None |  |
| 8  | Patents planned, issued or pending                                                                           | <u>  </u> X <u>  </u> None |  |
| 9  | Participation on a Data Safety Monitoring Board or Advisory Board                                            | <u>  </u> X <u>  </u> None |  |
| 10 | Leadership or fiduciary role in other board, society, committee or advocacy group, paid or unpaid            | <u>  </u> X <u>  </u> None |  |
| 11 | Stock or stock options                                                                                       | <u>  </u> X <u>  </u> None |  |
| 12 | Receipt of equipment, materials, drugs, medical writing, gifts or other services                             | <u>  </u> X <u>  </u> None |  |
| 13 | Other financial or non-financial interests                                                                   | <u>  </u> X <u>  </u> None |  |

Please place an "X" next to the following statement to indicate your agreement:

   X I certify that I have answered every question and have not altered the wording of any of the questions on this form.

**ICMJE DISCLOSURE FORM**

**Date:** 28 July 2022

**Your Name:** Jeff Peterson, MD

**Manuscript Title:** A Randomized Placebo-Controlled Study of Methotrexate to Increase Response Rates in Patients with Uncontrolled GOut Receiving Pegloticase (MIRROR RCT): Primary Efficacy and Safety Findings

**Manuscript number (if known):** ar-22-0825

In the interest of transparency, we ask you to disclose all relationships/activities/interests listed below that are related to the content of your manuscript. "Related" means any relation with for-profit or not-for-profit third parties whose interests may be affected by the content of the manuscript. Disclosure represents a commitment to transparency and does not necessarily indicate a bias. If you are in doubt about whether to list a relationship/activity/interest, it is preferable that you do so.

The following questions apply to the author's relationships/activities/interests as they relate to the current manuscript only.

The author's relationships/activities/interests should be defined broadly. For example, if your manuscript pertains to the epidemiology of hypertension, you should declare all relationships with manufacturers of antihypertensive medication, even if that medication is not mentioned in the manuscript.

In item #1 below, report all support for the work reported in this manuscript without time limit. For all other items, the time frame for disclosure is the past 36 months.

|                                                           |                                                                                                                                                                                | Name all entities with whom you have this relationship or indicate none (add rows as needed) | Specifications/Comments (e.g., if payments were made to you or to your institution)                                                                                                      |
|-----------------------------------------------------------|--------------------------------------------------------------------------------------------------------------------------------------------------------------------------------|----------------------------------------------------------------------------------------------|------------------------------------------------------------------------------------------------------------------------------------------------------------------------------------------|
| <b>Time frame: Since the initial planning of the work</b> |                                                                                                                                                                                |                                                                                              |                                                                                                                                                                                          |
| 1                                                         | All support for the present manuscript (e.g., funding, provision of study materials, medical writing, article processing charges, etc.)<br><b>No time limit for this item.</b> | Horizon Therapeutics plc                                                                     | Research support for the study (study site/investigator) received. Medical writing support and processing charges provided by Horizon, but no related payments were made to this author. |
|                                                           |                                                                                                                                                                                |                                                                                              |                                                                                                                                                                                          |
|                                                           |                                                                                                                                                                                |                                                                                              |                                                                                                                                                                                          |
|                                                           |                                                                                                                                                                                |                                                                                              |                                                                                                                                                                                          |
|                                                           |                                                                                                                                                                                |                                                                                              |                                                                                                                                                                                          |
|                                                           |                                                                                                                                                                                |                                                                                              |                                                                                                                                                                                          |
| <b>Time frame: past 36 months</b>                         |                                                                                                                                                                                |                                                                                              |                                                                                                                                                                                          |
| 2                                                         | Grants or contracts from any entity (if not indicated in item #1 above).                                                                                                       | <u> X </u> None                                                                              |                                                                                                                                                                                          |
|                                                           |                                                                                                                                                                                |                                                                                              |                                                                                                                                                                                          |
|                                                           |                                                                                                                                                                                |                                                                                              |                                                                                                                                                                                          |
| 3                                                         | Royalties or licenses                                                                                                                                                          | <u> X </u> None                                                                              |                                                                                                                                                                                          |
|                                                           |                                                                                                                                                                                |                                                                                              |                                                                                                                                                                                          |
|                                                           |                                                                                                                                                                                |                                                                                              |                                                                                                                                                                                          |

|    |                                                                                                              |                            |                                                                                                     |
|----|--------------------------------------------------------------------------------------------------------------|----------------------------|-----------------------------------------------------------------------------------------------------|
| 4  | Consulting fees                                                                                              | <u>  </u> X <u>  </u> None |                                                                                                     |
| 5  | Payment or honoraria for lectures, presentations, speakers bureaus, manuscript writing or educational events | Horizon Therapeutics plc   | Speaker fees                                                                                        |
| 6  | Payment for expert testimony                                                                                 | <u>  </u> X <u>  </u> None |                                                                                                     |
| 7  | Support for attending meetings and/or travel                                                                 | <u>  </u> X <u>  </u> None |                                                                                                     |
| 8  | Patents planned, issued or pending                                                                           | Horizon Therapeutics plc   | Named on patent                                                                                     |
| 9  | Participation on a Data Safety Monitoring Board or Advisory Board                                            | <u>  </u> X <u>  </u> None |                                                                                                     |
| 10 | Leadership or fiduciary role in other board, society, committee or advocacy group, paid or unpaid            | <u>  </u> X <u>  </u> None |                                                                                                     |
| 11 | Stock or stock options                                                                                       | <u>  </u> X <u>  </u> None |                                                                                                     |
| 12 | Receipt of equipment, materials, drugs, medical writing, gifts or other services                             | Horizon Therapeutics plc   | Medical writing support for Horizon-funded projects was provided (no funds received by the author). |
| 13 | Other financial or non-financial interests                                                                   | <u>  </u> X <u>  </u> None |                                                                                                     |

Please place an "X" next to the following statement to indicate your agreement:

   X    I certify that I have answered every question and have not altered the wording of any of the questions on this form.

ICMJE DISCLOSURE FORM

Date: 26 July 2022



Your Name: Kenneth Saag, MD

Manuscript Title: A Randomized Placebo-Controlled Study of Methotrexate to Increase Response Rates in Patients with Uncontrolled GOut Receiving Pegloticase (MIRROR RCT): Primary Efficacy and Safety Findings

Manuscript number (if known): ar-22-0825

In the interest of transparency, we ask you to disclose all relationships/activities/interests listed below that are related to the content of your manuscript. "Related" means any relation with for-profit or not-for-profit third parties whose interests may be affected by the content of the manuscript. Disclosure represents a commitment to transparency and does not necessarily indicate a bias. If you are in doubt about whether to list a relationship/activity/interest, it is preferable that you do so.

The following questions apply to the author's relationships/activities/interests as they relate to the current manuscript only.

The author's relationships/activities/interests should be defined broadly. For example, if your manuscript pertains to the epidemiology of hypertension, you should declare all relationships with manufacturers of antihypertensive medication, even if that medication is not mentioned in the manuscript.

In item #1 below, report all support for the work reported in this manuscript without time limit. For all other items, the time frame for disclosure is the past 36 months.

|                                                           |                                                                                                                                                                                | Name all entities with whom you have this relationship or indicate none (add rows as needed) | Specifications/Comments (e.g., if payments were made to you or to your institution)                                                                                                      |
|-----------------------------------------------------------|--------------------------------------------------------------------------------------------------------------------------------------------------------------------------------|----------------------------------------------------------------------------------------------|------------------------------------------------------------------------------------------------------------------------------------------------------------------------------------------|
| <b>Time frame: Since the initial planning of the work</b> |                                                                                                                                                                                |                                                                                              |                                                                                                                                                                                          |
| 1                                                         | All support for the present manuscript (e.g., funding, provision of study materials, medical writing, article processing charges, etc.)<br><b>No time limit for this item.</b> | Horizon Therapeutics plc                                                                     | Research support for the study (study site/investigator) received. Medical writing support and processing charges provided by Horizon, but no related payments were made to this author. |
|                                                           |                                                                                                                                                                                |                                                                                              |                                                                                                                                                                                          |
|                                                           |                                                                                                                                                                                |                                                                                              |                                                                                                                                                                                          |
|                                                           |                                                                                                                                                                                |                                                                                              |                                                                                                                                                                                          |
|                                                           |                                                                                                                                                                                |                                                                                              |                                                                                                                                                                                          |
|                                                           |                                                                                                                                                                                |                                                                                              |                                                                                                                                                                                          |
| <b>Time frame: past 36 months</b>                         |                                                                                                                                                                                |                                                                                              |                                                                                                                                                                                          |
| 2                                                         | Grants or contracts from any entity (if not indicated in item #1 above).                                                                                                       | <u> X </u> None                                                                              |                                                                                                                                                                                          |
|                                                           |                                                                                                                                                                                |                                                                                              |                                                                                                                                                                                          |
|                                                           |                                                                                                                                                                                |                                                                                              |                                                                                                                                                                                          |

|    |                                                                                                              |                          |                                                                                                     |
|----|--------------------------------------------------------------------------------------------------------------|--------------------------|-----------------------------------------------------------------------------------------------------|
| 3  | Royalties or licenses                                                                                        | <u>  X  </u> None        |                                                                                                     |
| 4  | Consulting fees                                                                                              | <u>  X  </u> None        |                                                                                                     |
| 5  | Payment or honoraria for lectures, presentations, speakers bureaus, manuscript writing or educational events | <u>  X  </u> None        |                                                                                                     |
| 6  | Payment for expert testimony                                                                                 | <u>  X  </u> None        |                                                                                                     |
| 7  | Support for attending meetings and/or travel                                                                 | <u>  X  </u> None        |                                                                                                     |
| 8  | Patents planned, issued or pending                                                                           | <u>  X  </u> None        |                                                                                                     |
| 9  | Participation on a Data Safety Monitoring Board or Advisory Board                                            | <u>  X  </u> None        |                                                                                                     |
| 10 | Leadership or fiduciary role in other board, society, committee or advocacy group, paid or unpaid            | <u>  X  </u> None        |                                                                                                     |
| 11 | Stock or stock options                                                                                       | <u>  X  </u> None        |                                                                                                     |
| 12 | Receipt of equipment, materials, drugs, medical writing, gifts or other services                             | Horizon Therapeutics plc | Medical writing support for Horizon-funded projects was provided (no funds received by the author). |
| 13 | Other financial or non-financial interests                                                                   | <u>  X  </u> None        |                                                                                                     |

Please place an "X" next to the following statement to indicate your agreement:

  X   I certify that I have answered every question and have not altered the wording of any of the questions on this form.



**ICMJE DISCLOSURE FORM**

**Date:** 26 July 2022

**Your Name:** Stephen Sainati, MD, PhD

**Manuscript Title:** A Randomized Placebo-Controlled Study of Methotrexate to Increase Response Rates in Patients with Uncontrolled GOut Receiving Pegloticase (MIRROR RCT): Primary Efficacy and Safety Findings

**Manuscript number (if known):** ar-22-0825

In the interest of transparency, we ask you to disclose all relationships/activities/interests listed below that are related to the content of your manuscript. "Related" means any relation with for-profit or not-for-profit third parties whose interests may be affected by the content of the manuscript. Disclosure represents a commitment to transparency and does not necessarily indicate a bias. If you are in doubt about whether to list a relationship/activity/interest, it is preferable that you do so.

The following questions apply to the author's relationships/activities/interests as they relate to the current manuscript only.

The author's relationships/activities/interests should be defined broadly. For example, if your manuscript pertains to the epidemiology of hypertension, you should declare all relationships with manufacturers of antihypertensive medication, even if that medication is not mentioned in the manuscript.

In item #1 below, report all support for the work reported in this manuscript without time limit. For all other items, the time frame for disclosure is the past 36 months.

|                                                           |                                                                                                                                                                                | Name all entities with whom you have this relationship or indicate none (add rows as needed) | Specifications/Comments (e.g., if payments were made to you or to your institution) |
|-----------------------------------------------------------|--------------------------------------------------------------------------------------------------------------------------------------------------------------------------------|----------------------------------------------------------------------------------------------|-------------------------------------------------------------------------------------|
| <b>Time frame: Since the initial planning of the work</b> |                                                                                                                                                                                |                                                                                              |                                                                                     |
| 1                                                         | All support for the present manuscript (e.g., funding, provision of study materials, medical writing, article processing charges, etc.)<br><b>No time limit for this item.</b> | Horizon Therapeutics plc                                                                     | Employee of Horizon during the study and current stock holder in Horizon.           |
|                                                           |                                                                                                                                                                                |                                                                                              |                                                                                     |
|                                                           |                                                                                                                                                                                |                                                                                              |                                                                                     |
|                                                           |                                                                                                                                                                                |                                                                                              |                                                                                     |
|                                                           |                                                                                                                                                                                |                                                                                              |                                                                                     |
|                                                           |                                                                                                                                                                                |                                                                                              |                                                                                     |
| <b>Time frame: past 36 months</b>                         |                                                                                                                                                                                |                                                                                              |                                                                                     |
| 2                                                         | Grants or contracts from any entity (if not indicated in item #1 above).                                                                                                       | <u> X </u> None                                                                              |                                                                                     |
|                                                           |                                                                                                                                                                                |                                                                                              |                                                                                     |
| 3                                                         | Royalties or licenses                                                                                                                                                          | <u> X </u> None                                                                              |                                                                                     |
|                                                           |                                                                                                                                                                                |                                                                                              |                                                                                     |
| 4                                                         | Consulting fees                                                                                                                                                                | <u> X </u> None                                                                              |                                                                                     |

|    |                                                                                                              |                            |              |
|----|--------------------------------------------------------------------------------------------------------------|----------------------------|--------------|
| 5  | Payment or honoraria for lectures, presentations, speakers bureaus, manuscript writing or educational events | <u>  </u> X <u>  </u> None |              |
| 6  | Payment for expert testimony                                                                                 | <u>  </u> X <u>  </u> None |              |
| 7  | Support for attending meetings and/or travel                                                                 | <u>  </u> X <u>  </u> None |              |
| 8  | Patents planned, issued or pending                                                                           | <u>  </u> X <u>  </u> None |              |
| 9  | Participation on a Data Safety Monitoring Board or Advisory Board                                            | <u>  </u> X <u>  </u> None |              |
| 10 | Leadership or fiduciary role in other board, society, committee or advocacy group, paid or unpaid            | <u>  </u> X <u>  </u> None |              |
| 11 | Stock or stock options                                                                                       | Horizon Therapeutics plc   | Stock holder |
| 12 | Receipt of equipment, materials, drugs, medical writing, gifts or other services                             | <u>  </u> X <u>  </u> None |              |
| 13 | Other financial or non-financial interests                                                                   | <u>  </u> X <u>  </u> None |              |

Please place an "X" next to the following statement to indicate your agreement:

   X    I certify that I have answered every question and have not altered the wording of any of the questions on this form.

ICMJE DISCLOSURE FORM

Date: 26 July 2022

Your Name: John R. P. Tesser, MD

Manuscript Title: A Randomized Placebo-Controlled Study of Methotrexate to Increase Response Rates in Patients with Uncontrolled GOut Receiving Pegloticase (MIRROR RCT): Primary Efficacy and Safety Findings

Manuscript number (if known): ar-22-0825

In the interest of transparency, we ask you to disclose all relationships/activities/interests listed below that are related to the content of your manuscript. "Related" means any relation with for-profit or not-for-profit third parties whose interests may be affected by the content of the manuscript. Disclosure represents a commitment to transparency and does not necessarily indicate a bias. If you are in doubt about whether to list a relationship/activity/interest, it is preferable that you do so.

The following questions apply to the author's relationships/activities/interests as they relate to the current manuscript only.

The author's relationships/activities/interests should be defined broadly. For example, if your manuscript pertains to the epidemiology of hypertension, you should declare all relationships with manufacturers of antihypertensive medication, even if that medication is not mentioned in the manuscript.

In item #1 below, report all support for the work reported in this manuscript without time limit. For all other items, the time frame for disclosure is the past 36 months.

|                                                           |                                                                                                                                                                                | Name all entities with whom you have this relationship or indicate none (add rows as needed) | Specifications/Comments (e.g., if payments were made to you or to your institution)                                                                                                          |
|-----------------------------------------------------------|--------------------------------------------------------------------------------------------------------------------------------------------------------------------------------|----------------------------------------------------------------------------------------------|----------------------------------------------------------------------------------------------------------------------------------------------------------------------------------------------|
| <b>Time frame: Since the initial planning of the work</b> |                                                                                                                                                                                |                                                                                              |                                                                                                                                                                                              |
| 1                                                         | All support for the present manuscript (e.g., funding, provision of study materials, medical writing, article processing charges, etc.)<br><b>No time limit for this item.</b> | Horizon Therapeutics plc                                                                     | Research support for the study (study site/investigator) was received. Medical writing support and processing charges provided by Horizon, but no related payments were made to this author. |
|                                                           |                                                                                                                                                                                |                                                                                              |                                                                                                                                                                                              |
|                                                           |                                                                                                                                                                                |                                                                                              |                                                                                                                                                                                              |
|                                                           |                                                                                                                                                                                |                                                                                              |                                                                                                                                                                                              |
|                                                           |                                                                                                                                                                                |                                                                                              |                                                                                                                                                                                              |
|                                                           |                                                                                                                                                                                |                                                                                              |                                                                                                                                                                                              |
| <b>Time frame: past 36 months</b>                         |                                                                                                                                                                                |                                                                                              |                                                                                                                                                                                              |
| 2                                                         | Grants or contracts from any entity (if not indicated in item #1 above).                                                                                                       | Horizon Therapeutics plc                                                                     | Research grant                                                                                                                                                                               |
|                                                           |                                                                                                                                                                                |                                                                                              |                                                                                                                                                                                              |
| 3                                                         | Royalties or licenses                                                                                                                                                          | <u> X </u> None                                                                              |                                                                                                                                                                                              |
|                                                           |                                                                                                                                                                                |                                                                                              |                                                                                                                                                                                              |
|                                                           |                                                                                                                                                                                |                                                                                              |                                                                                                                                                                                              |

|    |                                                                                                              |                         |  |
|----|--------------------------------------------------------------------------------------------------------------|-------------------------|--|
| 4  | Consulting fees                                                                                              | <u>  </u> <u>X</u> None |  |
| 5  | Payment or honoraria for lectures, presentations, speakers bureaus, manuscript writing or educational events | <u>  </u> <u>X</u> None |  |
| 6  | Payment for expert testimony                                                                                 | <u>  </u> <u>X</u> None |  |
| 7  | Support for attending meetings and/or travel                                                                 | <u>  </u> <u>X</u> None |  |
| 8  | Patents planned, issued or pending                                                                           | <u>  </u> <u>X</u> None |  |
| 9  | Participation on a Data Safety Monitoring Board or Advisory Board                                            | <u>  </u> <u>X</u> None |  |
| 10 | Leadership or fiduciary role in other board, society, committee or advocacy group, paid or unpaid            | <u>  </u> <u>X</u> None |  |
| 11 | Stock or stock options                                                                                       | <u>  </u> <u>X</u> None |  |
| 12 | Receipt of equipment, materials, drugs, medical writing, gifts or other services                             |                         |  |
| 13 | Other financial or non-financial interests                                                                   | <u>  </u> <u>X</u> None |  |

Please place an "X" next to the following statement to indicate your agreement:

   X I certify that I have answered every question and have not altered the wording of any of the questions on this form.

ICMJE DISCLOSURE FORM

Date: 26 July 2022

Your Name: Supra Verma, MD

Manuscript Title: A Randomized Placebo-Controlled Study of Methotrexate to Increase Response Rates in Patients with Uncontrolled GOut Receiving Pegloticase (MIRROR RCT): Primary Efficacy and Safety Findings

Manuscript number (if known): ar-22-0825

In the interest of transparency, we ask you to disclose all relationships/activities/interests listed below that are related to the content of your manuscript. "Related" means any relation with for-profit or not-for-profit third parties whose interests may be affected by the content of the manuscript. Disclosure represents a commitment to transparency and does not necessarily indicate a bias. If you are in doubt about whether to list a relationship/activity/interest, it is preferable that you do so.

The following questions apply to the author's relationships/activities/interests as they relate to the current manuscript only.

The author's relationships/activities/interests should be defined broadly. For example, if your manuscript pertains to the epidemiology of hypertension, you should declare all relationships with manufacturers of antihypertensive medication, even if that medication is not mentioned in the manuscript.

In item #1 below, report all support for the work reported in this manuscript without time limit. For all other items, the time frame for disclosure is the past 36 months.

|                                                           |                                                                                                                                                                                | Name all entities with whom you have this relationship or indicate none (add rows as needed) | Specifications/Comments (e.g., if payments were made to you or to your institution) |
|-----------------------------------------------------------|--------------------------------------------------------------------------------------------------------------------------------------------------------------------------------|----------------------------------------------------------------------------------------------|-------------------------------------------------------------------------------------|
| <b>Time frame: Since the initial planning of the work</b> |                                                                                                                                                                                |                                                                                              |                                                                                     |
| 1                                                         | All support for the present manuscript (e.g., funding, provision of study materials, medical writing, article processing charges, etc.)<br><b>No time limit for this item.</b> | Horizon Therapeutics plc                                                                     | Employee of and stock holder in Horizon.                                            |
|                                                           |                                                                                                                                                                                |                                                                                              |                                                                                     |
|                                                           |                                                                                                                                                                                |                                                                                              |                                                                                     |
|                                                           |                                                                                                                                                                                |                                                                                              |                                                                                     |
|                                                           |                                                                                                                                                                                |                                                                                              |                                                                                     |
|                                                           |                                                                                                                                                                                |                                                                                              |                                                                                     |
| <b>Time frame: past 36 months</b>                         |                                                                                                                                                                                |                                                                                              |                                                                                     |
| 2                                                         | Grants or contracts from any entity (if not indicated in item #1 above).                                                                                                       | <input checked="" type="checkbox"/> None                                                     |                                                                                     |
|                                                           |                                                                                                                                                                                |                                                                                              |                                                                                     |
| 3                                                         | Royalties or licenses                                                                                                                                                          | <input checked="" type="checkbox"/> None                                                     |                                                                                     |
|                                                           |                                                                                                                                                                                |                                                                                              |                                                                                     |
| 4                                                         | Consulting fees                                                                                                                                                                | <input checked="" type="checkbox"/> None                                                     |                                                                                     |

|    |                                                                                                              |                            |              |
|----|--------------------------------------------------------------------------------------------------------------|----------------------------|--------------|
| 5  | Payment or honoraria for lectures, presentations, speakers bureaus, manuscript writing or educational events | <u>  </u> X <u>  </u> None |              |
| 6  | Payment for expert testimony                                                                                 | <u>  </u> X <u>  </u> None |              |
| 7  | Support for attending meetings and/or travel                                                                 | <u>  </u> X <u>  </u> None |              |
| 8  | Patents planned, issued or pending                                                                           | <u>  </u> X <u>  </u> None |              |
| 9  | Participation on a Data Safety Monitoring Board or Advisory Board                                            | <u>  </u> X <u>  </u> None |              |
| 10 | Leadership or fiduciary role in other board, society, committee or advocacy group, paid or unpaid            | <u>  </u> X <u>  </u> None |              |
| 11 | Stock or stock options                                                                                       | Horizon Therapeutics plc   | Stock holder |
| 12 | Receipt of equipment, materials, drugs, medical writing, gifts or other services                             | <u>  </u> X <u>  </u> None |              |
| 13 | Other financial or non-financial interests                                                                   | <u>  </u> X <u>  </u> None |              |

Please place an "X" next to the following statement to indicate your agreement:

   X    I certify that I have answered every question and have not altered the wording of any of the questions on this form.

ICMJE DISCLOSURE FORM

Date: 26 July 2022

Your Name: Michael E. Weinblatt, MD

Manuscript Title: A Randomized Placebo-Controlled Study of Methotrexate to Increase Response Rates in Patients with Uncontrolled GOut Receiving Pegloticase (MIRROR RCT): Primary Efficacy and Safety Findings

Manuscript number (if known): ar-22-0825

In the interest of transparency, we ask you to disclose all relationships/activities/interests listed below that are related to the content of your manuscript. "Related" means any relation with for-profit or not-for-profit third parties whose interests may be affected by the content of the manuscript. Disclosure represents a commitment to transparency and does not necessarily indicate a bias. If you are in doubt about whether to list a relationship/activity/interest, it is preferable that you do so.

The following questions apply to the author's relationships/activities/interests as they relate to the current manuscript only.

The author's relationships/activities/interests should be defined broadly. For example, if your manuscript pertains to the epidemiology of hypertension, you should declare all relationships with manufacturers of antihypertensive medication, even if that medication is not mentioned in the manuscript.

In item #1 below, report all support for the work reported in this manuscript without time limit. For all other items, the time frame for disclosure is the past 36 months.

|                                                           |                                                                                                                                                                                | Name all entities with whom you have this relationship or indicate none (add rows as needed) | Specifications/Comments (e.g., if payments were made to you or to your institution)                                                          |
|-----------------------------------------------------------|--------------------------------------------------------------------------------------------------------------------------------------------------------------------------------|----------------------------------------------------------------------------------------------|----------------------------------------------------------------------------------------------------------------------------------------------|
| <b>Time frame: Since the initial planning of the work</b> |                                                                                                                                                                                |                                                                                              |                                                                                                                                              |
| 1                                                         | All support for the present manuscript (e.g., funding, provision of study materials, medical writing, article processing charges, etc.)<br><b>No time limit for this item.</b> | Horizon Therapeutics plc                                                                     | Consultant to Horizon. Medical writing support and processing charges provided by Horizon, but no related payments were made to this author. |
|                                                           |                                                                                                                                                                                |                                                                                              |                                                                                                                                              |
|                                                           |                                                                                                                                                                                |                                                                                              |                                                                                                                                              |
|                                                           |                                                                                                                                                                                |                                                                                              |                                                                                                                                              |
|                                                           |                                                                                                                                                                                |                                                                                              |                                                                                                                                              |
|                                                           |                                                                                                                                                                                |                                                                                              |                                                                                                                                              |
| <b>Time frame: past 36 months</b>                         |                                                                                                                                                                                |                                                                                              |                                                                                                                                              |
| 2                                                         | Grants or contracts from any entity (if not indicated in item #1 above).                                                                                                       | <u> X </u> None                                                                              |                                                                                                                                              |
|                                                           |                                                                                                                                                                                |                                                                                              |                                                                                                                                              |
| 3                                                         | Royalties or licenses                                                                                                                                                          | <u> X </u> None                                                                              |                                                                                                                                              |
|                                                           |                                                                                                                                                                                |                                                                                              |                                                                                                                                              |
| 4                                                         | Consulting fees                                                                                                                                                                | Horizon Therapeutics plc                                                                     | Consulting Fee                                                                                                                               |

|    |                                                                                                              |                          |                                                                                                     |
|----|--------------------------------------------------------------------------------------------------------------|--------------------------|-----------------------------------------------------------------------------------------------------|
|    |                                                                                                              |                          |                                                                                                     |
| 5  | Payment or honoraria for lectures, presentations, speakers bureaus, manuscript writing or educational events | <u> X </u> None          |                                                                                                     |
| 6  | Payment for expert testimony                                                                                 | <u> X </u> None          |                                                                                                     |
| 7  | Support for attending meetings and/or travel                                                                 | <u> X </u> None          |                                                                                                     |
| 8  | Patents planned, issued or pending                                                                           | <u> X </u> None          |                                                                                                     |
| 9  | Participation on a Data Safety Monitoring Board or Advisory Board                                            | <u> X </u> None          |                                                                                                     |
| 10 | Leadership or fiduciary role in other board, society, committee or advocacy group, paid or unpaid            | <u> X </u> None          |                                                                                                     |
| 11 | Stock or stock options                                                                                       | <u> X </u> None          |                                                                                                     |
| 12 | Receipt of equipment, materials, drugs, medical writing, gifts or other services                             | Horizon Therapeutics plc | Medical writing support for Horizon-funded projects was provided (no funds received by the author). |
| 13 | Other financial or non-financial interests                                                                   | <u> X </u> None          |                                                                                                     |

Please place an "X" next to the following statement to indicate your agreement:

X  I certify that I have answered every question and have not altered the wording of any of the questions on this form.



ICMJE DISCLOSURE FORM

Date: 26 July 2022

Your Name: Yan Xin, PhD

Manuscript Title: A Randomized Placebo-Controlled Study of Methotrexate to Increase Response Rates in Patients with Uncontrolled GOut Receiving Pegloticase (MIRROR RCT): Primary Efficacy and Safety Findings

Manuscript number (if known): ar-22-0825

In the interest of transparency, we ask you to disclose all relationships/activities/interests listed below that are related to the content of your manuscript. "Related" means any relation with for-profit or not-for-profit third parties whose interests may be affected by the content of the manuscript. Disclosure represents a commitment to transparency and does not necessarily indicate a bias. If you are in doubt about whether to list a relationship/activity/interest, it is preferable that you do so.

The following questions apply to the author's relationships/activities/interests as they relate to the current manuscript only.

The author's relationships/activities/interests should be defined broadly. For example, if your manuscript pertains to the epidemiology of hypertension, you should declare all relationships with manufacturers of antihypertensive medication, even if that medication is not mentioned in the manuscript.

In item #1 below, report all support for the work reported in this manuscript without time limit. For all other items, the time frame for disclosure is the past 36 months.

|                                                           |                                                                                                                                                                                | Name all entities with whom you have this relationship or indicate none (add rows as needed) | Specifications/Comments (e.g., if payments were made to you or to your institution) |
|-----------------------------------------------------------|--------------------------------------------------------------------------------------------------------------------------------------------------------------------------------|----------------------------------------------------------------------------------------------|-------------------------------------------------------------------------------------|
| <b>Time frame: Since the initial planning of the work</b> |                                                                                                                                                                                |                                                                                              |                                                                                     |
| 1                                                         | All support for the present manuscript (e.g., funding, provision of study materials, medical writing, article processing charges, etc.)<br><b>No time limit for this item.</b> | Horizon Therapeutics plc                                                                     | Employee of and stock holder in Horizon.                                            |
|                                                           |                                                                                                                                                                                |                                                                                              |                                                                                     |
|                                                           |                                                                                                                                                                                |                                                                                              |                                                                                     |
|                                                           |                                                                                                                                                                                |                                                                                              |                                                                                     |
|                                                           |                                                                                                                                                                                |                                                                                              |                                                                                     |
|                                                           |                                                                                                                                                                                |                                                                                              |                                                                                     |
| <b>Time frame: past 36 months</b>                         |                                                                                                                                                                                |                                                                                              |                                                                                     |
| 2                                                         | Grants or contracts from any entity (if not indicated in item #1 above).                                                                                                       | <u> X </u> None                                                                              |                                                                                     |
|                                                           |                                                                                                                                                                                |                                                                                              |                                                                                     |
| 3                                                         | Royalties or licenses                                                                                                                                                          | <u> X </u> None                                                                              |                                                                                     |
|                                                           |                                                                                                                                                                                |                                                                                              |                                                                                     |
| 4                                                         | Consulting fees                                                                                                                                                                | <u> X </u> None                                                                              |                                                                                     |

|    |                                                                                                              |                            |              |
|----|--------------------------------------------------------------------------------------------------------------|----------------------------|--------------|
| 5  | Payment or honoraria for lectures, presentations, speakers bureaus, manuscript writing or educational events | <u>  </u> X <u>  </u> None |              |
| 6  | Payment for expert testimony                                                                                 | <u>  </u> X <u>  </u> None |              |
| 7  | Support for attending meetings and/or travel                                                                 | <u>  </u> X <u>  </u> None |              |
| 8  | Patents planned, issued or pending                                                                           | <u>  </u> X <u>  </u> None |              |
| 9  | Participation on a Data Safety Monitoring Board or Advisory Board                                            | <u>  </u> X <u>  </u> None |              |
| 10 | Leadership or fiduciary role in other board, society, committee or advocacy group, paid or unpaid            | <u>  </u> X <u>  </u> None |              |
| 11 | Stock or stock options                                                                                       | Horizon Therapeutics plc   | Stock holder |
| 12 | Receipt of equipment, materials, drugs, medical writing, gifts or other services                             | <u>  </u> X <u>  </u> None |              |
| 13 | Other financial or non-financial interests                                                                   | <u>  </u> X <u>  </u> None |              |

Please place an "X" next to the following statement to indicate your agreement:

   X    I certify that I have answered every question and have not altered the wording of any of the questions on this form.
